# Supplementary material for: Hyodeoxycholic acid ameliorates nonalcoholic fatty liver disease by inhibiting RAN-mediated PPARα nucleus-cytoplasm shuttling
Source: Nat Commun. 2023 Sep 6;14:5451. doi: 10.1038/s41467-023-41061-8 (PMC10482907; doi:10.1038/s41467-023-41061-8)
Supplement: Supplementary file 4 — Source Data [file 41467_2023_41061_MOESM4_ESM.xlsx]

## Sheet: Fig1
Fig1c	Health	NAFLD	Fig1d	Health	NAFLD	Fig1e	Health	NAFLD	Fig1f	Health	NAFLD	Fig1g	Health	NAFLD	Fig1h	Health	NAFLD	Fig1j	HDCA	ALT	AST	CAP score	HCA	ALT	AST	CAP score	Fig1k		Serum	Liver	SI content	Cecum content	Colon content	Fig1l		HDCA	HCA	THDCA	THCA	Fig1m		HDCA	HCA	THDCA	GHCA
	21.456	17.605		7.548	7.389		5.177	0.514		4.919	11.263		20.293	16.048		0.26	0.123		13.853	13	18	224	4.919	13	18	224		Control	409.75	14.1125	2378.59	4215	2038.4		Control	111.34	8.56	271.48	18.37		Control	3.4502	4.5327	6.0457	0.0839
	56.596	10.9072		5.11	7.098		0.449	0.009		5.168	8.137		7.617	10.678		0.109	0.0002		15.141	9	13	199	5.168	9	13	199			508.12	100.013	2305.26	6816.7	5787.1			245.83	7.33	251.78	3.18			23.0414	24.6794	51.8869	0.4052
	39.101	30.183		15.654	6.403		0.598	0.217		9.252	18.084		31.675	12.546		1.984	1.078		7.548	9	14	221	9.252	9	14	221			199.42	31.544	5536.17	1624	2279.5			34.18	2.6	161.05	1.59			9.303	8.8398	13.2109	0.1903
	45.017	30.779		4.494	9.163		0.583	0.168		7.798	5.092		7.886	4.833		0.122	0.038		5.11	16	14	183	7.798	16	14	183			255.09	57.1711	7177.68	3159.1	3669.4			37.99	2.28	213.95	0.87			14.2832	9.1602	33.4542	0.2735
	27.43	15.774		7.985	8.702		0.089	0.085		6.058	2.988		3.334	0.736		0.487	0.0002		11.715	8	15	200	6.058	8	15	200			260.06	52.7694	5375.49	11142.5	3183.4			125.44	4.66	127.83	2.13			8.7695	12.7162	30.9904	0.2933
	22.642	13.7232		6.873	6.609		3.129	0.072		13.766	7.521		31.537	15.109		0.631	0.0002		8.055	16	20	221	13.766	16	20	221			560.14	42.0024	1063.27	3605.6	3127.1			175.91	14.29	361.34	8.6			9.7494	17.3373	14.4412	0.4745
	42.673	10.565		7.038	5.87		0.701	0.682		4.277	15.274		21.057	5.622		0.368	0.056		11.082	28	27	228	4.277	28	27	228			170.67	27.7968	4680.31	3478.4	3296.3			40.26	2.15	128.26	0			7.899	7.3179	12.281	0.2989
	45.33	24.754		5.775	4.452		0.083	0.0008		24.407	6.308		11.224	0.763		1.088	0.291		9.181	12	17	231	24.407	12	17	231			105.21	9.1882	1058.41	1147.2	1536.7			31.23	3.66	70.32	0			2.2071	4.4856	2.4189	0.0766
	32.2038	22.7088		6.952	5.836		0.12	0.119		10.375	6.259		9.849	0.736		2.06	0.877		6.599	9	14	229	10.375	13	22	227			95.75	8.1213	4523.32	2669.9	2415.9			44.67	2.02	49.06	0			2.0574	2.5135	3.502	0.0484
	55.799	12.398		8.071	4.784		0.403	0.166		4.443	3.291		8.946	1.182		2.867	0.0002		8.219	12	21	229	4.443	9	14	229		HFHS	41.35	4.2483	1432.36	939	915.7		HFHS	11.65	2.9	22.71	4.09		HFHS	1.6726	1.3842	1.1508	0.0407
	19.075	39.52		15.141	4.11		0.181	0.12		6.554	9.084		20.576	10.807		0.002	1.327		14.994	4	16	223	6.554	12	21	229			40.02	10.3229	572.844	1847.7	691.6			15.83	2.69	20.7	0.8			1.5636	1.7969	6.6049	0.3575
	46.038	24.533		9.903	5.664		0.0008	0.0008		2.162	3.15		23.097	12.845		0.359	0.141		4.884	37	24	212	2.162	37	24	212			43.24	8.3776	639.574	920.7	840.3			10.68	1.86	28.06	2.64			2.3683	3.3675	2.5895	0.0523
	39.562	23.603		14.206	10.908		2.967	0.0008		5.065	4.174		31.57	3.439		1.633	0.034		13.33	11	16	183	5.065	11	16	183			53.24	4.336	757.873	1242.6	1824.2			19.54	1.85	31.85	0			1.0846	0.866	2.3229	0.0625
	28.485	34.901		7.37	7.216		0.29	4.499		7.647	12.1		3.766	17.484		0.11	0.65		7.37	13	18	208	7.647	13	18	208			143.42	8.3056	797.456	636.4	713.2			15.91	1.14	125.13	1.24			2.872	2.1032	3.2021	0.1283
	35.431	13.5312		13.33	2.569		0.631	0.172		10.286	10.425		20.556	8.131		1.962	0.0002		14.206	14	18	201	10.286	14	18	201			93.53	16.9647	1284.08	2525	396.7			8.15	0.64	80.98	3.76			2.3266	4.1252	10.2833	0.2296
	28.51	23.398		4.884	5.676		0.577	0.256		14.964	7.355		12.485	5.05		0.287	0.189		9.903	12	15	225	14.964	12	15	225			67.29	5.5573	545.155	570	719.7			21.62	2.43	43.24	0			1.3286	0.9388	3.2273	0.0626
	22.2	18.393		13.853	7.225		0.119	0.219		7.018	22.398		18.261	4.418		0.434	0.071		8.071	5	13	194	7.018	5	13	194			24.22	3.3328	453.329	360.6	1612.9			1.92	0.4	21.9	0			1.073	1.5268	0.7206	0.0124
	17.9232	49.125		14.994	4.22		0.024	0.009		5.766	10.637		15.481	0.316		0.0002	3.094		6.952	10	15	216	5.766	10	15	216
	49.847	69.766		8.219	7.432		0.383	0.493		2.188	8.512		13.42	8.528		1.031	0.287		5.775	24	19	231	2.188	24	19	231
	23.69	27.298		6.599	6.411		0.23	0.757		8.258	5.505		2.397	4.835		0.122	0.141		7.038	8	15	197	8.258	8	15	197
	36.788	36.304		9.181	6.116		1.943	1.061		21.073	2.155		18.927	38.595		0.375	0.272		6.873	14	19	194	21.073	14	19	194
	88.936	11.1452		11.082	7.046		0.008	0.636		7.378	57.833		8.197	3.578		5.573	0.0002		7.985	14	18	217	7.378	14	18	217
	49.705	13.4042		8.055	7.764		0.518	0.366		17.101	13.19		14.3	7.19		0.632	0.0002		4.494	13	17	217	17.101	13	17	217
	21.763	71.871		11.715	6.461		0.174	2.068		53.639	15.241		13.896	12.607		0.386	1.918		15.654	9	15	219	53.639	9	15	219
		30.8942			7.117			0.929			2.011			1.159			0.0002		8.035	92	40	351	11.263	92	40	351
		10.941			6.404			0.865			2.647			2.128			0.0002		9.476	110	60	333	8.137	110	60	333
		23.19			6.324			1.889			33.598			28.005			0.463		8.545	117	57	320	18.084	117	57	320
		23.6098			7.407			0.555			13.649			9.573			0.141		7.389	151	83	332	5.092	151	83	332
		61.237			3.931			0.0008			3.886			0.65			0.192		7.098	81	39	308	2.988	81	39	308
		33.659			15.752			0.781			12.865			2.757			0.186		6.403	198	88	323	7.521	198	88	323
		9.9962			6.965			0.0008			11.032			5.029			0.0002		9.163	138	54	311	15.274	138	54	311
		37.158			8.035			0.237			50.857			6.02			1.298		8.702	109	45	369	6.308	109	45	369
		29.464			9.476			6.009			4.102			7.61			1.164		6.609	145	64	322	6.259	145	64	322
		39.567			8.545			0.046			1.262			1.723			0.175		5.87	183	61	323	3.291	183	61	323
																			4.452	86	38	312	9.084	86	38	312
																			5.836	138	77	332	3.15	138	77	332
																			4.784	85	49	348	4.174	85	49	348
																			4.11	95	51	321	12.1	95	51	321
																			5.664	103	56	306	10.425	103	56	306
																			10.908	90	43	328	7.355	90	43	328
																			7.216	99	46	308	22.398	99	46	308
																			2.569	97	88	306	10.637	97	88	306
																			5.676	167	73	325	8.512	167	73	325
																			7.225	106	41	308	5.505	106	41	308
																			4.22	112	65	323	2.155	112	65	323
																			7.432	121	53	309	57.833	121	53	309
																			6.411	149	73	324	13.19	149	73	324
																			6.116	110	30	336	15.241	110	30	336
																			7.046	121	88	306	2.011	121	88	306
																			7.764	86	40	314	2.647	86	40	314
																			6.461	199	79	319	33.598	199	79	319
																			7.117	99	61	308	13.649	99	61	308
																			6.404	133	65	334	3.886	133	65	334
																			6.324	90	54	353	12.865	90	54	353
																			7.407	157	58	350	11.032	157	58	350
																			3.931	102	43	373	50.857	102	43	373
																			15.752	85	63	332	4.102	85	63	332
																			6.965	136	63	327	1.262	136	63	327

## Sheet: Fig2
Fig2b		Energy intake						Body weight	Control	HFHS	HDCA	Liver weight	Control	HFHS	HDCA	Liver index	Control	HFHS	HDCA
		Control	HFHS	HDCA					28.2	49.5	37.5		0.886	2.42	0.86		0.0314184	0.0488889	0.0229333
	1w	11.1193	14.2215	14.5761					30.7	50.1	42.3		1.021	2.747	1.093		0.0332573	0.0548303	0.0258392
	2w	12.1767	13.8489	14.5838					29.3	44.6	37.9		0.972	1.593	0.955		0.0331741	0.0357175	0.0251979
	3w	12.5927	15.2227	14.8194					30.4	48.2	44.4		1.137	2.186	0.817		0.0374013	0.0453527	0.0184009
	4w	12.7248	14.9469	13.979					27.8	44.3	34.3		0.914	1.709	1.164		0.0328777	0.0385779	0.0339359
	5w	14.7767	15.6437	15.8206					31.4	49.1	34.2		1.083	2.027	0.86		0.0344904	0.0412831	0.0251462
	6w	16.1633	15.7075	16.5947
	7w	10.842	15.4948	17.0634
	8w	10.842	13.3707	14.6207
	9w	11.8797	14.8243	16.1144
	10w	12.6447	14.8825	16.5284
	11w	12.3454	15.9924	16.4458
	12w	9.60267	14.8399	16.5057
Fig2e		Control	HFHS	HDCA		Control	HFHS	HDCA		Control	HFHS	HDCA
	Steatosis	0	3	2	Inflammation	0	2	1	NAFLD activity score	0	5	3
		0	3	2		0	2	1		0	5	3
		0	3	2		0	1	1		0	4	2
		0	3	1		0	1	0		0	4	2
		0	3	1		0	1	0		0	4	1
		0	3	0		0	1	0		0	4	0
Fig2f		Control	HFHS	HDCA		Control	HFHS	HDCA		Control	HFHS	HDCA
	Liver TG	0.033075	0.062876	0.05636	Serum ALT	7.12341	39.2287	16.6787	Serum AST	21.1017	28.6468	17.6937
		0.04369	0.078613	0.06366		8.5314	70.7391	14.94		21.1334	30.0693	18.8848
		0.03814	0.070412	0.06932		5.94256	51.0252	14.9213		21.6123	28.9885	20.2935
		0.022827	0.073468	0.058705		8.38299	46.623	15.1007		19.2476	29.548	17.3273
		0.039676	0.080227	0.05254		4.65435	75.5185	15.2442		14.4454	31.2143	24.1537
		0.024895	0.086754	0.051832		3.50766	62.3243	15.8613		7.8116	28.6042	25.2212
Fig2g		Control	HFHS	HDCA		Control	HFHS	HDCA		Control	HFHS	HDCA
	Liver TNF-α	0.582849	0.928576	0.391429	Liver IL-6	0.254121	0.325722	0.300322	Liver IL-β	0.101408	0.173802	0.185418
		0.580704	0.715861	0.416676		0.257435	0.327057	0.323269		0.130008	0.189617	0.147014
		0.601999	1.10362	0.471006		0.260529	0.29536	0.318575		0.127805	0.156187	0.148243
		0.675378	0.634598	0.497475		0.288421	0.365148	0.272232		0.131815	0.152801	0.117082
		0.67828	0.648201	0.46512		0.271214	0.35412	0.291625		0.106154	0.157181	0.123955
		0.537179	0.785091	0.493442		0.272089	0.376997	0.259405		0.104084	0.175751	0.10227
Fig2h		Control	HFHS	HDCA		Control	HFHS	HDCA		Control	HFHS	HDCA
	Fasting blood glucose	5.7	12.3	7.8	Fasting insulin	11.1936	102.186	18.7295	HOMA-IR	2.83571	55.8617	6.49289
		5.9	11.3	6.4		11.5524	138.001	25.0874		3.0293	69.3072	7.13598
		6.6	11.5	5.4		13.6587	130.84	23.6598		4.00656	66.8736	5.67835
		4.3	7.4	5.7		18.9089	72.7836	38.7472		3.6137	23.9377	9.81596
		6	7.7	6.6		12.5354	72.0112	13.3155		3.34276	24.6438	3.90587
		6.8	7.4	5.5		9.83856	139.413	13.2531		2.97343	45.8514	3.23964
Fig2i	ipGTT	Control						HFHS						HDCA									Control	HFHS	HDCA
	0min	5.7	5.9	6.6	5.8	6	6.8	12.3	11.3	11.5	7.4	7.7	7.4	7.8	6.4	5.4	5.7	6.6	5.5			AUC of ipGTT	1140.75	3055.5	1859.25
	15min	13	15.1	14.1	14.8	16.8	13.4	27.1	23.1	21.8	21.3	22.4	19.1	21.8	18.7	20.1	17.3	18.8	19.9				1311	2595	1869.75
	30min	14	15.3	18.4	15.5	14.7	15.3	28.9	26.7	28	20.3	21.6	20.3	22.7	20.1	27.6	18.4	18.4	21.9				1359	2600.25	2016
	60min	8.6	10.9	11	11.5	10.3	12.2	26.7	23.8	23.1	16.8	17	17.7	16.9	18.4	20.3	14.9	10.2	12.5				1344.75	1923.75	1649.25
	90min	7.1	7.9	8.1	8.8	7.9	7.9	26.3	19.6	21.3	13.9	13.8	12.7	11.2	13.7	10.4	11.2	10.9	11				1296.75	1986.75	1498.5
	120min	7.8	8.8	7.4	8.1	8.2	7.5	21.1	17.4	15	11.4	12.2	11	8	8.4	8.8	10	8	7.8				1311.75	1875.75	1654.5
	ipITT	Control						HFHS						HDCA									Control	HFHS	HDCA
	0min	8.9	8.1	9.4	4.9	6.8	5.5	11.7	11.8	9.9	11.8	11.7	13.7	8.4	7.5	8.2	11.2	9.2	10.7			AUC of ipITT	933.75	1335	714.75
	15min	7.5	5.8	6.7	5	5.9	4.2	11.7	14.1	10.2	10	9.4	11.1	6.7	7.9	9.6	13	5.3	9.5				910.5	1521.75	753
	30min	6.6	5.7	6.1	4.6	5.9	3.2	9.1	11.9	7.5	7.8	6.8	7.7	5.1	5.7	5.6	7.3	5.7	6.3				879.75	1177.5	934.5
	60min	6.4	6.8	6.4	3.9	6.8	3.7	9.1	10.4	8.3	9.8	6.5	9.5	4.9	4.9	5.5	9.2	3.2	5.5				545.25	1222.5	1322.25
	90min	8.5	9.8	7.4	4.7	8	4.7	12.8	13.6	11.7	12	8.7	11.7	5.7	6	8.7	12.3	5	6.2				855.75	989.25	599.25
	120min	10.6	9.1	10.5	4.8	9.3	5.1	14	15.6	12.1	10.3	10.1	11.8	7.9	8.2	11.8	15.6	5.1	7.9				504.75	1255.5	834

## Sheet: Fig3
Fig3i			Control			HFHS			HDCA
	Protein expression	CD36	108.176	91.8501	99.9738	250.729	247.122	218.919	99.1834	146.026	95.6732
		FABP1	108.233	98.5107	93.256	109.51	105.566	117.828	134.619	147.761	136.907
		CPT1A	104.367	94.2876	101.346	118.542	115.734	111.35	100.11	106.303	115.115
		CPT2	96.3357	99.2773	104.387	90.5466	86.3819	93.8853	98.3552	101.682	104.082
		ACADM	101.678	95.8977	102.424	99.7979	83.2392	98.7995	83.7188	96.8843	91.0333
		ACADL	101.641	97.0166	101.342	89.8372	86.2235	85.7031	107.584	112.656	113.898
		ACADVL	99.1766	99.7408	101.083	88.2636	86.6816	86.7785	101.502	110.453	104.863
		ECHS1	100.792	95.7374	103.471	84.7987	76.5697	86.3247	84.1178	84.7495	87.3568
		HADHA	97.2077	100.98	101.812	99.4829	93.644	94.8746	119.926	127.663	124.639
		HADHB	97.2005	99.0051	103.794	98.4212	96.2878	97.828	119.406	126.808	119.058
		ACAA2	98.5229	98.2231	103.254	70.9475	69.2478	75.5884	97.08	95.3743	99.3908
		HMGCS2	102.151	96.8108	101.038	121.921	108.06	124.103	137.359	154.315	145.482
		HMGCL	101.367	99.6726	98.9601	113.014	101.457	102.405	92.3084	98.24	95.4689
		BDH1	100.134	100.207	99.6584	129.774	123.158	129.417	131.568	141.42	144.024
			Control						HFHS						HDCA
	Gene expression	Cd36	130.514	132.919	99.5419	63.6126	117.261	56.1518	651.342	708.672	591.803	705.628	634.702	606.823	158.786	570.403	701.947	552.045	648.887	311.584
		Fabp1	108.039	125.644	125.183	74.2585	110.38	56.4951	138.418	146.314	179.61	148.755	170.443	164.201	329.844	218.126	244.184	230.288	294.55	288.849
		Cpt1a	99.4872	90.8076	95.9018	98.3083	94.1064	121.389	85.8	94.0091	74.2003	93.2412	82.0092	94.6364	69.2035	76.7582	107.539	76.0931	100.942	101.185
		Cpt2	102.94	112.131	109.857	86.2301	105.066	83.776	82.1425	78.2034	95.9606	74.9599	87.1758	84.5263	109.38	105.23	104.558	96.9845	116.586	107.457
		Acadm	107.334	113.072	109.622	83.8984	107.757	78.3179	121.882	120.433	135.511	113.514	117.699	120.395	103.018	121.212	143.075	104.842	127.875	136.11
		Acadl	105.506	105.849	113.837	87.4076	102.983	84.4177	96.5956	101.394	123.61	107.219	124.39	101.015	116.744	125.495	135.357	116.579	161.946	139.747
		Acadvl	94.4919	101.601	109.672	94.8367	106.22	93.1788	83.6697	80.7716	99.0932	84.7947	87.2956	83.3283	98.8773	103.381	108.348	93.851	113.987	108.982
		Echs1	94.4565	96.5005	103.392	100.536	101.768	103.347	123.963	120.839	129.073	114.595	125.228	124.743	80.2402	86.1167	88.4162	79.893	89.1565	96.1926
		Hadha	101.477	111.141	110.414	83.4882	105.845	87.6345	88.2849	98.0841	95.4717	101.45	94.0354	96.2738	115.856	130.278	145.21	129.72	147.183	135.037
		Hadhb	105.459	106.742	113.156	88.2218	101.317	85.1045	91.9958	90.6736	109.036	104.159	114.369	104.688	147.801	147.227	136.369	126.645	159.605	160.191
		Acaa2	101.394	108.664	109.396	87.4907	108.713	84.342	98.6395	94.9157	113.698	91.4062	109.963	104.448	123.977	116.753	113.972	110.135	118.2	129.79
		Hmgcs2	101.1	107.898	110.209	89.3097	106.568	84.9155	89.2397	92.665	99.2268	89.5838	96.8056	89.4252	110.384	112.163	127.851	113.209	128.581	128.596
		Hmgcl	104.552	104.459	106.494	89.4458	106.65	88.399	144.907	136.868	146.101	135.808	127.085	132.502	115.065	125.323	124.311	111.974	139.982	135.321
		Bdh1	97.7772	110.451	104.514	87.1253	111.865	88.268	153.962	171.518	180.875	183.041	200.501	169.903	171.254	180.651	209.043	175.505	223.707	218.369

## Sheet: Fig4
Fig4a		Control						HFHS						HDCA
	Total	111.321	98.8131	89.8658	98.3394	104.925	96.7356	88.129	80.6851	95.691	100.29	77.2742	90.6682	104.397	87.0216	88.2396	95.474	82.9426	93.4776
	Nuclear	108.885	83.0949	108.02	52.9552	157.683	89.3615	49.5761	41.3404	69.0587	44.6537	34.4063	39.5373	66.8509	111.855	104.717	86.9796	86.3644	176.774
	Cytoplasmic	97.1693	103.429	99.4017	92.6182	96.5325	110.849	113.48	112.022	104.706	152.249	138.004	133.649	68.7387	76.6096	67.5768	103.967	106.558	94.8693
	Nuclear/Cytoplasmic	112.057	80.3401	108.67	57.1758	163.347	80.6153	43.687	36.9038	65.9548	29.3295	24.9314	29.583	97.2537	146.006	154.961	83.6608	81.049	186.334
Fig4c		Control						HFHS						HDCA
	CD36	121.788	159.668	163.068	84.3821	30.7857	40.3084	269.482	203.709	271.716	167.823	165.351	174.68	131.251	135.334	112.106	139.01	131.609	108.019
	FABP1	105.402	86.1794	108.418	163.896	69.6643	66.44	104.541	111.912	71.2713	60.1197	150.115	84.7729	145.049	197.307	248.316	142.879	212.941	208.049
	CPT2	110.309	92.9666	96.7241	97.5541	91.9221	110.524	54.1134	56.6937	59.945	46.2365	53.596	45.3265	115.934	123.057	81.3099	72.9447	84.3262	69.4748
	HMGCS2	100.725	96.9152	102.36	100.645	103.184	96.1706	84.8193	82.1969	93.2486	85.7117	77.0021	94.9347	109.276	116.767	125.206	123.523	154.583	152.998
Fig4d		Control						HFHS						HDCA
	p-p65	155.324	57.7821	86.8941	68.1055	108.253	123.642	205.819	307.545	336.643	378.132	421.712	361.686	285.668	274.513	157.128	208.102	200.707	241.603
	p-p65/p65	101.159	92.3046	106.537	80.0597	103.16	116.78	415.703	347.783	291.957	391.403	486.137	374.837	296.658	248.037	256.273	235.393	217.727	245.721
Fig4e		Control						HFHS					HDCA
	Ccl2	61.5236	90.887	160.809	64.2129	159.668	62.9	5360.65	5343.86	1114.72	9033.26	2144.08	584.359	210.676	439.836	654.733	258.778
	Ccl9	40.4996	57.4757	86.2878	107.304	97.8569	210.576	270.485	428.013	164.428	405.376	193.891	1.61922	12.5245	51.0703	12.5245	29.4618
	Cxcl9	122.72	104.282	67.3502	67.6343	154.125	83.8892	1863.48	893.507	312.609	990.704	412.716	160.116	207.985	337.489	557.025	207.985
	Cxcl10	63.7182	98.2313	105.104	67.7603	149.827	115.359	994.227	1141.49	278.119	878.413	615.363	156.842	289.129	462.923	411.947	242.673
	Col3a1	29.6986	163.747	70.1929	69.7196	155.039	111.603	1621.55	4673.33	784.872	3920.26	1705.91	428.976	2098.26	138.605	372.599	473.678
	Col1a1	100.169	115.225	48.9365	92.1201	160.762	82.7871	1376.7	4186.34	768.361	2793.56	1094.43	356.578	768.361	592.879	340.465	718.137
Fig4f		DMSO			HDCA 20 μM			HDCA 100 μM
	Total	81.83	131.477	86.6934	112.598	117.135	106.431	118.174	127.2	133.433
	Nuclear	80.3036	104.759	114.937	162.503	171.041	243.675	186.666	225.593	225.371
	Cytoplasmic	77.5359	101.25	121.215	113.283	123.141	134.32	74.372	104.656	102.649
	Nuclear/Cytoplasmic	103.57	103.466	94.8215	143.449	138.899	181.414	250.989	215.556	219.556
	CPT1	89.1041	90.6609	120.235	113.391	94.5682	97.7405	191.252	167.344	163.027
	CPT2	104.428	107.697	87.8748	98.9551	76.7366	93.9875	140.466	174.515	150.009
	FABP1	115.43	97.3885	87.182	98.7468	126.371	120.954	133.504	155.535	161.425
Fig4g		DMSO			HDCA 100μM
	Ccl2	94.6878	98.5036	106.809	38.7696	33.8564	25.9446
	Ccl9	101.439	97.4664	101.095	22.374	24.1505	19.1063
	Cxcl1	107.711	97.8547	94.434	83.3599	74.3437	70.1635
	Cxcl9	83.5248	132.615	83.8603	78.1259	42.9596	27.7433
	Cxcl10	99.0388	100.627	100.334	51.427	46.0489	32.202
	Cxcl11	102.818	93.3686	103.814	59.1949	46.1126	48.0762
	Tnf-α	85.4141	89.0246	125.561	92.3254	104.276	63.7018
	Il-6	63.9864	135.093	100.921	157.67	117.158	56.5348
Fig4h		DMSO			LPS			LPS+HDCA50μM			LPS+HDCA100μM
	Ccl2	28.6572	146.09	125.253	8030.57	9698.4	7789.45	1552.84	2465.66	1615.43	1968.02	1357.87	1850.38
	Ccl9	103.834	106.71	89.4558	3548.04	3360.81	4140.84	2365.37	1898.01	1814.35	1421.47	1473.72	1151.8
	Tnf-α	81.1042	126.461	92.435	1199.02	1106.34	689.996	823.302	734.336	807.524	877.138	1031.93	853.811
	Il-1β	93.1031	86.0579	120.839	55175.3	78166.2	41135.8	35921.9	21248.1	29383.5	19614.7	27523.4	20788
	Il-6	81.3476	120.245	98.4072	375566	416064	323312	88235.9	115553	83889.3	170804	118276	153657

## Sheet: Fig5
Fig5c		Energy intake
	WT control	17.8554	18.587	18.4294	18.1134	14.6108	17.5515	17.3186	21.6941
	WT HDCA	15.0479	16.3527	17.1069	22.2207	17.2188	17.0826	18.3167	17.1439
	Pparα-/- control	14.1145	15.3536	13.8151	14.998	15.6967	14.5621	15.7715	18.4503
	Pparα-/- HDCA	13.3761	14.5676	14.1894	15.548	13.8502	16.9197	12.6026	18.7396
Fig5d		WT control	WT HDCA	Pparα-/-control	Pparα-/-HDCA	Fig5e		WT control	WT HDCA	Pparα-/-control	Pparα-/-HDCA
	Body weight	43.9	32.5	51.1	42.4		Liver TG	0.100513	0.0519683	0.113013	0.107777
		43.1	31.7	49.9	48.4			0.0770886	0.0582411	0.0816703	0.149383
		41.8	39.2	46.9	47.5			0.0754969	0.0608245	0.112813	0.116261
		40.6	33.4	46.7	51.4			0.0627563	0.0695332	0.0867161	0.0846263
		36.8	34.6	50.4	52.5			0.116174	0.0707485	0.104313	0.112224
		36.4	34.5	48.5	45.7			0.0799473	0.0621555	0.109845	0.0963166
Fig5f		WT control	WT HDCA	Pparα-/-control	Pparα-/-HDCA			WT control	WT HDCA	Pparα-/-control	Pparα-/-HDCA			WT control	WT HDCA	Pparα-/-control	Pparα-/-HDCA
	Steatosis score	3	2	3	3		inflammation score	1	1	2	2		NAFLD activity score	4	3	5	5
		3	2	3	3			2	1	2	2			5	3	5	5
		3	2	3	3			1	1	2	2			4	3	5	5
		3	2	3	3			1	0	2	1			3	2	5	4
		2	1	3	3			1	1	2	2			4	2	5	5
		3	1	3	3			1	0	2	1			4	1	5	4
Fig5g
		WT control	WT HDCA	Pparα-/-control	Pparα-/-HDCA			WT control	WT HDCA	Pparα-/-control	Pparα-/-HDCA			WT control	WT HDCA	Pparα-/-control	Pparα-/-HDCA
	FABP1	102.537	83.9654	61.1749	36.6958		CPT2	122.936	181.465	83.1936	64.4472		HMGCS2	99.7845	160.921	78.7058	67.4008
		107.982	137.689	43.073	53.9451			81.3197	216.288	65.8352	64.8946			88.468	172	74.302	69.5924
		89.4816	102.742	57.422	68.6696			95.7443	159.157	71.8813	62.3197			111.748	119.986	69.6624	65.4891
		84.0498	122.285	81.3135	74.4066			104.522	99.2144	73.3177	87.9454			96.4847	121.546	66.2986	99.729
		110.129	165.884	63.4991	56.4768			98.7783	123.617	75.2695	74.0657			109.015	116.334	73.2933	78.5904
		105.821	158.575	95.0167	59.0181			96.6998	151.574	79.8651	68.1258			94.5	144.862	77.8558	79.7509
Fig5h		WT control	WT HDCA	Pparα-/-control	Pparα-/-HDCA			WT control	WT HDCA	Pparα-/-control	Pparα-/-HDCA			WT control	WT HDCA	Pparα-/-control	Pparα-/-HDCA
	Liver TNF-α	1.06344	0.800753	1.7221	1.72841		Liver IL-6	0.314185	0.261955	0.383565	0.316119		Liver IL-β	0.494477	0.412084	0.701523	0.596077
		0.875289	0.438835	1.2886	1.49861			0.3395	0.249315	0.370266	0.306955			0.475368	0.36081	0.523321	0.503736
		1.00726	0.803068	1.18788	1.37068			0.298209	0.299053	0.353007	0.299213			0.520258	0.421271	0.603021	0.59723
		0.895781	0.889936	1.1019	1.22127			0.342254	0.316909	0.339201	0.305879			0.466546	0.422355	0.545985	0.543659
		1.25129	0.732864	1.548	1.41001			0.289121	0.257036	0.349455	0.382122			0.486537	0.497245	0.532344	0.649775
		0.803171	0.9198	1.12006	1.09619			0.305775	0.299899	0.315237	0.321379			0.561174	0.385875	0.547452	0.502043
Fig5k
		Energy intake
	Pparαflox/flox Control	16.4497	17.1483	15.9343	18.2955	17.8761	14.4543	16.7502	17.5559
	Pparαflox/flox HDCA	16.2459	16.799	17.6551	19.7047	17.9926	15.7219	16.6046	18.2837
	Pparαhep-/- Control	16.6562	16.0003	12.9527	13.3902	15.5775	10.7899	12.4327	15.902
	Pparαhep-/- HDCA	13.7376	16.9078	11.1241	13.3868	19.2156	14.6459	17.2706	15.9639
Fig5l		Pparαflox/flox Control	Pparαflox/flox HDCA	Pparαhep-/- Control	Pparαhep-/- HDCA	Fig5m		Pparαflox/flox Control	Pparαflox/flox HDCA	Pparαhep-/- Control	Pparαhep-/- HDCA
	Body weight	42.2	35.6	47.9	40.1		Liver TG	0.0666453	0.0687274	0.0774374	0.0810023
		46.9	32.8	44.5	43.9			0.0818174	0.0612516	0.0846753	0.11022
		42.2	32	45.7	41.8			0.0905198	0.062116	0.0949711	0.0801623
		44.5	36.8	42.2	42.6			0.0864454	0.0678493	0.0990105	0.104722
					44.8						0.114997
Fig5n		Pparαflox/flox Control	Pparαflox/flox HDCA	Pparαhep-/- Control	Pparαhep-/- HDCA			Pparαflox/flox Control	Pparαflox/flox HDCA	Pparαhep-/- Control	Pparαhep-/- HDCA			Pparαflox/flox Control	Pparαflox/flox HDCA	Pparαhep-/- Control	Pparαhep-/- HDCA
	Steatosis score	3	2	3	2		inflammation score	2	1	1	2		NAFLD activity score	5	3	4	4
		3	2	3	3			2	0	2	2			5	2	5	5
		3	1	3	2			2	1	2	2			5	2	5	4
		3	2	3	3			2	1	1	1			5	3	4	4
					3						1						4
Fig5o
		Pparαflox/flox Control	Pparαflox/flox HDCA	Pparαhep-/- Control	Pparαhep-/- HDCA			Pparαflox/flox Control	Pparαflox/flox HDCA	Pparαhep-/- Control	Pparαhep-/- HDCA			Pparαflox/flox Control	Pparαflox/flox HDCA	Pparαhep-/- Control	Pparαhep-/- HDCA
	FABP1	93.0213	192.629	164.767	102.743		CPT2	89.5725	224.674	118.126	90.7475		HMGCS2	84.7752	234.995	113.533	82.158
		115.028	181.307	151.922	91.0206			113.553	197.752	134.139	77.9072			116.809	273.989	123.338	59.9763
		91.9503	220.503	131.439	85.9782			96.8745	254.098	126.435	70.6192			98.4159	256.977	109.508	63.8147
		100	200.135	80.731	85.7159			100	184.707	64.1428	66.5245			100	128.067	57.7665	41.4375
					104.329						94.91						41.6682
Fig5p		Pparαflox/flox Control	Pparαflox/flox HDCA	Pparαhep-/- Control	Pparαhep-/- HDCA			Pparαflox/flox Control	Pparαflox/flox HDCA	Pparαhep-/- Control	Pparαhep-/- HDCA			Pparαflox/flox Control	Pparαflox/flox HDCA	Pparαhep-/- Control	Pparαhep-/- HDCA
	Liver TNF-α	0.895781	0.63657	1.45063	0.819569		Liver IL-6	0.314007	0.276336	0.391787	0.303957		Liver IL-β	0.422227	0.387331	0.567293	0.61595
		0.875289	0.314463	1.22258	1.19153			0.289729	0.261379	0.340267	0.320996			0.449765	0.381426	0.570794	0.581234
		0.802786	0.679521	1.21522	1.06887			0.303179	0.248403	0.359311	0.294			0.450071	0.371589	0.565907	0.514028
		0.798269	0.650827	1.27929	1.41132			0.291766	0.234138	0.379855	0.382435			0.410478	0.376	0.619554	0.518681
					0.954828						0.370358						0.605834

## Sheet: Fig6
Fig6a		DMSO			HDCA-20μM				HDCA-100μM
	Cell Activity	1.02454	0.992637	0.98282	1.01211	1.17125	1.13081	1.06697	0.892258	0.949919
	Firefly Luciferase	0.916975	1.0816	1.00142	1.38219	1.46248	1.14536	1.46289	1.37759	1.35883
Fig6b		DMSO			HDCA			Gug			Gug+HDCA
	Shp	97.9438	84.7331	117.323	466.965	210.901	332.213	109.978	123.098	129.224	152.861	231.861	127.324
	Cpt1	103.508	86.7155	109.776	190.712	279.844	155.489	90.8688	101.232	74.9989	290.817	278.801	264.802
	Cpt2	109.564	103.532	86.9048	118.893	136.186	148.245	139.933	104.735	123.257	197.482	188.411	175.094
	Fabp1	48.394	153.195	98.411	347.943	213.448	183.167	44.3264	157.775	53.3522	168.838	334.593	307.519
	Hadhb	107.627	104.679	87.6931	117.278	119.425	144.948	107.402	98.9333	115.161	139.172	130.936	115.475
	Acadl	106.188	83.8869	109.925	201.79	172.858	129.156	125.413	170.939	177.703	231.795	306.103	218.831
	Acadm	106.812	88.5031	104.685	187.588	162.451	125.929	110.216	124.513	133.06	155.76	209.426	126.103
	Acadvl	98.1528	83.7123	118.135	167.722	117.129	117.592	91.5698	91.8596	88.9027	147.579	104.988	140.21
Fig6d	DMSO	HDCA	IPZ	IPZ_HDCA	LMB	LMB_HDCA
	42.437	62.388	1.23534	13.2677	88.2896	50.853
	52.5174	61.2327	0.202653	45.6362	74.8162	43.4346
	46.4413	49.1294	0.229079	51.3968	77.1756	57.5399
	41.9552	65.9445	0.320928	11.3317	63.6164	72.9922
	36.7552	53.8464	0.072784	26.3569	62.34	50.5441
	35.423	55.6354	0.222851	10.7222	31.2251	48.507
	22.3086	52.8915	0.079043	10.0064	33.953	59.5962
	46.9031		0.114619	12.8385	67.6169	46.7272
				11.3524		61.2987
						68.9203
						53.4793
						64.8362
Fig6e
		DMSO			HDCA 100μM
	Total CRM1	104.222	84.0393	111.739	106.157	115.595	125.336
	Total RAN	96.0191	103.994	99.987	86.5533	91.015	96.9269
	Nuclear CRM1	88.6249	65.6328	145.742	352.467	354.097	478.454
	Nuclear RAN	114.529	97.5803	87.8905	103.768	147.572	179.051
	Cytoplasmic CRM1	91.1661	90.6146	118.219	70.9795	71.2266	77.461
	Cytoplasmic RAN	108.788	95.0217	96.1905	105.523	103.772	99.4468
Fig6f
		Control						HFHS						HDCA
	Total CRM1	103.278	88.3752	108.346	106.065	95.5154	98.4195	76.6916	90.0035	140.672	84.8374	126.319	116.216	86.7444	71.809	72.1678	136.48	108.528	117.856
	Total RAN	77.1476	62.3148	160.538	102.456	89.9107	107.633	92.0288	85.5581	156.925	79.5454	81.6249	78.0548	104.203	74.2947	74.7764	78.8495	92.4588	78.6441
	Nuclear CRM1	61.5733	84.7769	53.6498	158.07	82.2705	159.66	74.6812	89.9252	59.6815	82.6263	59.0153	75.7051	140.931	106.322	153.736	121.706	108.654	120.005
	Nuclear RAN	91.2534	83.9913	98.763	117.433	87.2704	121.289	119.104	100.519	97.5921	81.0319	82.166	65.1172	115.635	90.183	128.47	68.6933	45.9453	34.8267
	Cytoplasmic CRM1	115.714	80.8046	103.481	90.7049	109.181	100.114	130.726	107.152	153.048	132.103	138.625	116.237	85.5827	74.7386	65.823	97.7817	96.3467	70.5539
	Cytoplasmic RAN	100.947	95.6445	103.409	114.698	90.2278	95.0742	47.3432	82.3871	87.3882	34.547	89.5773	71.5587	81.7377	86.0847	100.895	105.099	94.7346	94.2661

## Sheet: Fig7
	Fig7c													Fig7e
								DMSO			HDCA
							45°C	100	100	100	100	100	100
							47.5°C	87.7152	98.6012	99.4284	99.9175	92.7694	98.9036
							50°C	84.7792	94.0606	99.2373	92.4125	90.7648	98.507
							52.5°C	69.6396	75.7693	82.0109	86.5506	88.5191	94.933
							55°C	39.8773	54.6147	50.8105	79.208	80.8172	81.6235
							57.5°C	14.0985	29.4127	19.0842	28.3675	57.4696	39.045
							60°C	0	7.51238	5.11076	8.32523	11.0408	2.90971
	Fig7f
	Fig7g											Fig7i
			DMSO	HDCA		DMSO	HDCA		DMSO	HDCA
		PPARa/RAN Duolink number per cell	12.087	4.15385	CRM1/RAN Duolink number per cell	64.8621	7.80952	PPARa/CRM1 Duolink number per cell	20	4.14286
			10.0312	5.625		53.7778	6.1		17.75	0.5
			8	2.23077		80.2857	10		17.6	6
			10.75	4.72727		71.087	9.71429		25.7143	6.42857
				3			12		9.55556	7.5
				3.5					23.4	8
				3.33333					9.57143
				4

## Sheet: FigS1
FigS1a	GHCA	ALT	AST	CAP score			FigS1b		Health																								NAFLD
	20.293	13	18	224				GCDCA	762.973	572.039	1829.17	654.797	342.975	1425	685.447	566.484	1101.83	441.377	1710.32	577.643	920.446	563.222	1923.42	1248.08	1940.83	577.543	892.86	805.48	564.308	141.553	804.467	1612.45	2447.05	434.499	1593.26	495.84	482.741	871.307	490.312	263.059	214.647	590.732	764.694	806.269	213.052	1546.94	1335.36	257.372	268.415
	7.617	9	13	199				CDCA	164.942	32.42	182.602	55.762	56.141	215.264	83.697	283.49	326.491	103.781	736.446	34.744	82.076	368.015	757.34	351.394	266.66	210.357	22.771	155.839	317.734	66.755	339.366	1199.58	521.65	75.591	575.114	171.373	89.99	136.931	1151.65	519.441	388.936	176.654	211.213	126.87	238.5	430.875	282.655	268.21	447.931
	31.675	9	14	221				DCA	263.545	295.574	240.003	56.278	249.626	106.378	280.06	547.864	164.677	273.418	989.521	79.041	130.141	535.824	1088.39	693.414	508.396	252.167	60.394	561.424	26.344	200.274	257.9	889.173	20.975	149.23	276.861	52.531	88.28	111.015	348.04	351.82	242.119	152.818	7.294	6.767	48.356	16.89	314.557	343.677	463.781
	7.886	16	14	183				GUDCA	168.266	166.791	786.585	249.758	26.53	561.693	131.957	24.735	285.457	134.909	461.916	60.001	167.381	69.634	609.228	151.191	238.52	172.485	188.09	86.183	535.392	42.861	217.974	298.652	206.362	46.371	342.135	172.253	17.778	207.661	488.143	42.928	143.908	26.671	187.553	23.516	35.166	191.553	423.211	59.921	47.764
	3.334	8	15	200				βUDCA	48.174	121.736	207.907	171.774	21.035	100.186	108.963	80.982	160.172	70.668	166.071	24.109	54.39	65.442	346.406	192.972	51.548	180.128	42.187	118.306	1605.85	122.054	108.291	56.764	64.187	44.415	152.895	233.255	31.749	141.317	756.075	106.431	1165.2	107.476	252.075	45.414	372.713	136.607	171.967	439.807	18.139
	31.537	16	20	221				GCA	78.432	127.502	302.011	81.681	64.177	169.981	108.923	175.8	124.854	91.968	319.094	85.055	107.799	58.475	306.772	164.499	268.469	78.601	166.382	89.108	27.226	56.525	162.848	298.501	587.926	101.276	307.677	121.914	36.834	168.872	85.848	69.693	35.954	123.407	131.828	272.936	109.899	293.345	180.354	41.526	75.874
	21.057	28	27	228				GDCA	253.21	277.453	215.437	101.33	86.004	200.59	306.927	256.719	126.449	177.457	469.955	87.891	218.793	145.631	500.887	656.824	560.229	100.606	144.556	252.733	8.046	54.219	163.695	436.812	24.332	90.297	226.872	20.933	66.122	86.422	68.881	60.78	57.36	92.089	4.59	4.378	13.787	14.989	241.295	71.106	108.142
	11.224	12	17	231				GLCA-3S	160.583	251.068	55.6	80.543	134.466	90.988	286.973	443.309	27.732	68.238	475.417	221.436	207.759	131.797	489.578	807.908	161.29	113.366	140.442	215.268	1.211	39.75	103.051	90.651	2.569	501.787	96.738	12.519	48.227	172.968	190.511	57.776	50.071	155.458	1.855	0.626	18.525	8.929	115.377	184.159	94.992
	9.849	13	22	227				CA	83.428	17.574	32.134	33.065	30.491	54.716	19.971	1045.48	24.775	20.226	40.203	20.329	17.5	41.482	42.629	78.488	29.373	24.429	21.202	104.836	26.661	28.043	64.805	1801.37	134.574	17.966	83.59	22.097	32.459	30.247	73.789	93.922	27.636	21.643	33.362	24.641	29.492	98.402	83.972	22.728	788.017
	8.946	9	14	229				UDCA	24.358	25.548	109.781	30.841	13.145	50.301	23.849	18.946	95.71	42.541	190.821	5.96	14.571	76.806	224.638	59.679	31.957	67.877	10.749	47.462	186.795	35.729	91.979	138.91	46.346	12.049	116.403	51.618	11.414	53.572	574.472	66.949	190.87	21.034	68.03	7.571	39.393	68.697	64.236	85.74	49.564
	20.576	12	21	229				TCDCA	78.082	48.885	74.866	37.16	17.599	29.518	58.119	8.341	73.285	59.367	58.968	53.849	93.81	50.442	59.208	58.349	169.943	28.725	78.166	23.04	29.845	11.554	47.542	219.022	107.617	54.468	109.105	38.851	47.2	74.316	29.235	18.39	30.102	75.217	63.851	43.913	11.706	156.747	48.013	22.371	33.817
	23.097	37	24	212				GDCA-3S	43.02	61.241	44.69	31.562	32.694	26.043	70.311	205.096	14.759	29.229	57.753	67.432	51.216	17.708	144.948	83.226	51.784	32.868	39.326	56.014	0.147	27.697	30.965	11.51	2.821	44.634	24.45	3.5	1.971	39.669	22.46	15.472	12.335	15.555	0.42	0.419	5.38	0.992	41.915	12.684	23.923
	31.57	11	16	183				TCA	7.837	11.439	11.628	5.813	2.371	7.235	22.929	7.223	5.282	19.022	25.299	10.508	15.029	5.645	15.956	14.802	31.889	4.9	18.545	7.257	3.203	6.007	5.549	116.413	60.974	25.009	15.711	8.822	9.11	25.795	7.072	7.559	10.709	44.491	18.828	24.767	16.23	56.083	11.72	9.58	20.84
	3.766	13	18	208				TDCA	37.518	41.945	13.396	11.6	8.223	6.485	49.129	4.061	16.205	42.377	31.299	21.75	45.587	17.515	28.348	63.226	92.78	11.962	28.79	11.424	0.084	4.154	14.291	91.946	0.228	23.073	24.853	3.932	9.214	7.835	6.158	7.501	12.695	24.324	0.088	0.052	0.522	1.093	19.501	10.249	22.212
	20.556	14	18	201				GCDCA-3S	19.698	14.214	39.318	35.474	7.287	24.48	19.803	48.076	18.012	9.609	20.754	49.866	19.98	6.657	44.396	14.03	17.828	23.47	22.079	11.052	23.601	5.122	10.816	5.883	47.8	60.716	17.848	17.041	10.868	65.151	23.188	12.069	5.594	12.351	32.391	22.886	20.098	44.323	22.676	16.766	10.403
	12.485	12	15	225				βDCA	13.146	30.198	10.883	5.155	19.365	5.221	24.402	14.514	8.233	18.316	47.579	0.616	10.012	42.393	151.6	42.254	28.974	18.461	2.021	43.506	35.62	17.718	9.298	18.049	4.917	11.847	13.202	5.893	5.215	8.057	16.917	23.556	14.718	17.432	6.824	0.0616	22.006	5.136	13.723	91.511	3.637
	18.261	5	13	194				7-KetoLCA	2.929	5.019	13.697	4.92	2.528	4.24	2.288	14.817	9.21	4.361	19.677	1.182	1.507	18.777	22.888	10.343	7.169	7.178	1.06	5.684	68.842	2.429	17.752	52.267	5.633	3.607	9.353	4.967	1.81	8.425	59.487	5.666	22.463	2.792	9.998	3.614	2.358	4.764	5.6	12.322	28.944
	15.481	10	15	216				HCA	4.919	5.168	9.252	7.798	6.058	13.766	4.277	24.407	10.375	4.443	6.554	2.162	5.065	7.647	10.286	14.964	7.018	5.766	2.188	8.258	21.073	7.378	17.101	53.639	11.263	8.137	18.084	5.092	2.988	7.521	15.274	6.308	6.259	3.291	9.084	3.15	4.174	12.1	10.425	7.355	22.398
	13.42	24	19	231				GHCA	20.293	7.617	31.675	7.886	3.334	31.537	21.057	11.224	9.849	8.946	20.576	23.097	31.57	3.766	20.556	12.485	18.261	15.481	13.42	2.397	18.927	8.197	14.3	13.896	16.048	10.678	12.546	4.833	0.736	15.109	5.622	0.763	0.736	1.182	10.807	12.845	3.439	17.484	8.131	5.05	4.418
	2.397	8	15	197				TLCA-3S	13.321	12.726	2.782	3.354	5.673	0.132	34.547	24.847	1.53	12.841	11.04	20.181	28.87	1.851	20.68	38.336	8.351	7.548	9.661	6.804	0.0004	3.17	3.739	12.736	0.052	55.17	0.615	0.471	3.704	8.195	3.657	5.013	2.057	16.087	0.0004	0.0004	0.512	2.018	2.164	30.107	16.532
	18.927	14	19	194				12-KetoLCA	10.175	24.895	8.372	3.193	16.025	2.992	14.742	21.506	5.779	10.222	38.219	2.671	11.091	30.403	23.063	13.221	14.6	6.77	3.285	25.783	0.0312	9.821	9.064	25.257	0.0312	9.097	4.044	1.614	3.649	6.542	4.674	3.995	3.881	5.628	0.0312	0.312	0.358	0.791	11.968	12.951	8.005
	8.197	14	18	217				HDCA	13.853	15.141	7.548	5.11	11.715	8.055	11.082	9.181	6.599	8.219	14.994	4.884	13.33	7.37	14.206	9.903	8.071	6.952	5.775	7.038	6.873	7.985	4.494	15.654	8.035	9.476	8.545	7.389	7.098	6.403	9.163	8.702	6.609	5.87	4.452	5.836	4.784	4.11	5.664	10.908	7.216
	14.3	13	17	217				GLCA	4.229	8.367	6.232	4.633	4.441	4.385	10.15	18.997	1.638	6.205	16.62	1.319	4.045	17.851	32.782	32.626	13.192	3.742	2.714	7.344	0.092	2.856	9.107	22.484	0.381	10.881	10.365	0.352	8.167	4.112	0.865	1.017	1.251	12.217	0.006	0.0006	1.252	0.0006	13.946	8.848	8.107
	13.896	9	15	219				LCA	10.667	13.266	6.41	3.142	7.938	3.697	9.64	12.021	2.892	10.717	41.056	5.294	4.509	18.338	27.355	11.637	10.8	6.451	5.587	20.361	1.925	7.259	6.794	11.432	1.565	9.366	5.736	2.15	8.51	5.382	2.459	2.432	3.505	6.626	1.047	0.835	1.314	1.084	6.772	10.975	4.778
	16.048	92	40	351				LCA-3S	2.326	8.9	1.894	2.365	3.354	2.371	2.542	100.894	0.568	1.599	7.699	1.166	2.194	4.827	10.054	22.25	2.022	1.311	2.222	19.752	0.071	2.521	3.628	52.124	0.171	7.823	3.557	0.0071	2.319	3.052	4.946	3.652	1.595	2.992	0.122	0.147	0.369	0.565	4.17	7.831	11.899
	10.678	110	60	333				isoLCA	13.618	15.317	2.168	3.92	12.61	4.37	9.623	7.203	1.903	7.519	13.978	1.317	10.156	17.554	36.406	16.538	9.287	6.822	2.522	13.314	0.261	9.257	4.7	9.927	0.14	12.422	4.564	0.656	3.634	3.482	1.461	2.847	2.15	7.171	0.302	0.066	1.025	0.456	2.569	43.579	4.745
	12.546	117	57	320				DCA-3Gln	2.902	2.397	2.574	2.638	2.618	8.932	2.514	3.048	2.684	3.673	3.28	2.641	3.127	2.432	2.765	2.584	2.399	2.563	2.525	2.583	9.766	2.785	4.775	2.754	3.462	4.966	8.071	2.889	4.196	4.064	3.867	2.815	3.062	3.019	3.125	3.057	3.007	3.246	13.032	4.987	4.435
	4.833	151	83	332				DHCA	3.816	4.06	4.943	4.117	4.173	3.908	3.979	3.679	4.253	3.688	3.974	4.434	4.373	3.838	3.982	3.857	3.874	4.355	3.69	4.006	4.133	3.939	4.157	4.148	3.89	3.86	4.546	4.373	3.859	3.887	3.799	4.142	3.528	3.649	3.822	4.018	3.942	3.801	3.76	4.05	3.61
	0.736	81	39	308				NorCA	1.496	2.382	2.337	3.987	0.562	6.272	5.5	7.563	4.355	3.122	2.48	4.14	4.205	2.866	7.714	8.33	2.746	4.084	2.078	1.973	1.93	0.424	3.173	4.139	7.414	6.089	2.927	2.232	1.375	4.874	2.168	1.742	1.351	5.622	5.529	2.029	1.557	1.783	9.283	2.488	4.395
	15.109	198	88	323				CDCA-3Gln	2.056	1.775	2.058	2.112	1.895	6.969	1.929	2.611	2.085	2.984	2.848	2.145	2.786	2.089	2.324	2.23	1.859	1.948	1.971	1.946	6.55	2.142	3.733	2.181	2.731	3.625	6.231	2.427	3.365	3.376	3.392	2.288	2.543	2.565	2.687	2.68	2.437	2.853	11.397	3.779	3.975
	5.622	138	54	311				DCA-3S	2.64	3.096	2.719	2.507	2.688	2.638	2.418	23.293	2.362	2.494	2.898	2.374	2.443	2.625	2.996	4.491	2.402	2.558	2.559	4.401	2.283	2.676	3.029	6.042	2.271	2.806	2.468	2.269	2.347	2.539	2.689	2.698	2.457	2.35	2.263	2.257	2.305	2.312	3.145	2.573	3.857
	0.763	109	45	369				apoCA	3.522	3.941	2.123	2.327	2.996	2.254	2.973	2.873	2.538	2.742	4.064	2.396	2.734	2.358	5.285	3.772	2.83	2.542	1.939	3.307	2.15	2.88	2.711	3.253	2.266	3.072	2.642	2.22	2.289	2.88	2.22	2.323	2.162	2.942	2.062	2.185	2.1	2.154	3.514	6	2.454
	0.736	145	64	322				12-DHCA	1.817	4.954	1.943	1.753	1.714	1.724	5.412	2.288	1.964	2.197	3.09	1.638	2.401	2.389	2.398	4.311	1.899	1.976	1.496	2.484	2.574	2.268	2.045	3.033	4.229	2.559	4.263	1.955	1.584	2.379	2.317	3.351	2.622	1.904	2.895	1.622	2.329	2.902	2.245	4.295	2.446
	1.182	183	61	323				muroCA	1.586	2.643	1.698	1.688	2.273	1.948	2.273	3.088	1.846	2.393	3.385	1.623	2.662	2.69	3.496	6.056	2.319	3.033	1.763	2.449	2.004	2.523	3.218	5.249	1.939	2.217	1.846	2.198	2.115	1.892	1.596	2.143	1.568	1.855	1.8	2.171	1.874	2.106	1.809	2.912	3.005
	10.807	86	38	312				6-KetoLCA	2.165	2.378	2.105	2.17	2.56	2.156	2.269	2.032	2.052	2.137	2.043	1.831	1.948	1.85	2.646	2.16	1.969	2.372	1.966	1.77	2.249	2.257	2.234	2.188	2.483	2.24	2.203	2.303	2.225	2.37	2.226	2.159	2.476	1.795	1.998	1.997	1.896	2.02	1.951	2.733	2.065
	12.845	138	77	332				dehydroLCA	2.478	2.385	2.081	2.088	2.219	2.234	2.474	2.021	2.095	2.217	2.557	2.077	2.468	2.236	2.489	2.526	2.4	2.086	2.001	2.376	2.262	2.105	1.966	2.007	1.894	2.247	2.143	1.99	1.992	1.938	2.047	1.916	2.02	2.149	2.003	1.901	1.887	1.815	2.151	2.249	2.116
	3.439	85	49	348				7-DHCA	1.598	1.577	2.08	1.587	1.516	1.587	1.456	8.458	1.502	1.556	1.804	1.667	1.531	2.263	1.683	1.657	1.554	1.625	1.584	1.892	2.962	1.477	1.754	7.559	1.878	1.887	1.948	1.638	1.536	1.698	2.137	1.832	2.664	1.505	2.106	1.837	1.719	2.195	1.97	1.72	4.488
	17.484	95	51	321				UCA	0.1819	1.845	2.918	1.938	1.908	1.95	1.849	1.943	1.866	1.919	2.013	1.84	1.849	1.87	2.118	1.905	0.1819	2.013	0.1819	2.069	2.109	1.873	1.952	2.228	3.82	1.91	2.679	2.036	1.842	1.912	2.525	1.971	2.027	1.866	2.476	1.861	2.698	2.151	2.081	1.908	2.032
	8.131	103	56	306				3-DHCA	1.728	1.663	1.637	1.483	1.53	1.621	1.978	2.386	1.91	1.838	2.163	1.518	1.72	1.894	2.122	2.462	2.144	1.855	1.579	1.916	2.233	1.592	1.581	3.012	2.352	1.631	1.997	1.671	1.568	1.902	1.89	2.039	1.593	1.673	2.088	1.495	1.731	1.945	2.005	2.112	1.905
	5.05	90	43	328				βHDCA	2.59	3.077	1.595	1.693	2.104	1.663	2.27	1.654	1.525	1.913	2.448	1.617	2.68	2.048	2.478	2.194	2.027	2.271	1.787	2.105	2.052	1.756	1.651	2.881	1.747	2.573	1.604	1.91	1.547	1.569	1.639	1.622	1.661	1.779	1.483	1.467	1.554	1.551	1.829	2.993	1.838
	4.418	99	46	308				TUDCA	2.471	1.457	3.282	2.708	0.0014	0.441	1.542	0.0014	1.696	0.816	0.014	0.408	0.161	0.197	2.087	0.525	2.548	0.939	2.333	0.038	2.312	0.0014	1.145	7.414	0.619	1.143	1.877	1.469	0.151	2.554	3.192	0.0014	1.933	0.095	1.637	0.0014	0.188	1.458	2.306	0.29	1.01
	0.316	97	88	306				NorDCA	5.09	4.957	0.461	0.873	1.261	1.661	4.208	3.412	0.742	1.433	1.554	0.703	1.433	3.685	2.556	8.949	1.672	0.673	0.638	2.607	0.0057	4.756	3.539	3.97	0.057	2.444	1.041	0.122	0.494	1.494	5.045	0.948	1.106	1.123	0.17	0.059	0.178	0.157	2.882	1.088	3.218
	8.528	167	73	325				isoalloLCA	1.772	1.984	1.423	1.426	1.742	1.552	1.684	1.732	1.468	1.585	1.825	1.436	2.074	1.696	1.948	2.091	1.699	1.46	1.424	1.864	1.387	1.579	1.457	1.79	1.393	2.14	1.511	1.424	1.46	1.474	1.493	1.451	1.451	1.484	1.457	1.424	1.411	1.448	1.478	1.601	1.631
	4.835	106	41	308				UDCA-7S	0.497	0.428	0.213	0.51	1.74	0.776	0.614	2.739	0.675	0.803	2.71	0.161	3.227	1.828	4.239	3.576	1.812	0.61	0.406	0.007	0.116	0.007	0.007	0.581	0.35	0.195	0.522	0.797	0.464	0.457	0.653	0.848	0.561	0.243	0.479	0.652	0.214	0.613	2.784	0.997	0.543
	38.595	112	65	323				GHDCA	5.177	0.449	0.598	0.583	0.089	3.129	0.701	0.083	0.12	0.403	0.181	0.0008	2.967	0.29	0.631	0.577	0.119	0.024	0.383	0.23	1.943	0.008	0.518	0.174	0.514	0.009	0.217	0.168	0.085	0.072	0.682	0.0008	0.119	0.166	0.12	0.0008	0.0008	4.499	0.172	0.256	0.219
	3.578	121	53	309				THCA	1.088	0.11	0.632	0.386	0.26	0.109	1.984	0.122	0.487	0.631	0.368	2.06	2.867	0.002	0.359	1.633	1.962	0.287	0.434	0.0002	1.031	0.122	0.375	5.573	1.298	1.164	0.175	0.123	0.0002	1.078	0.038	0.0002	0.0002	0.056	0.291	0.877	0.0002	1.327	0.141	0.034	0.65
	7.19	149	73	324				TLCA	0.292	0.345	0.001	0.11	0.228	0.018	1.4	0.095	0.001	0.126	0.209	0.029	0.168	0.886	0.499	1.382	1.014	0.001	0.598	0.836	0.001	0.001	0.449	2.226	0.001	1.809	0.133	0.001	0.34	0.111	0.075	0.001	0.086	1.029	0.001	0.001	0.001	0.001	0.01	0.607	0.313
	12.607	110	30	336
	1.159	121	88	306
	2.128	86	40	314
	28.005	199	79	319
	9.573	99	61	308
	0.65	133	65	334
	2.757	90	54	353
	5.029	157	58	350
	6.02	102	43	373
	7.61	85	63	332
	1.723	136	63	327
[truncated: 17 more columns]

## Sheet: FigS2
FigS2a		Control	HFHS	FigS2b		Control	HFHS	FigS2c		Control	HFHS	FigS2d		Control	HFHS	FigS2e		Control	HFHS	FigS2g		Control	HFHS		Control	HFHS		Control	HFHS	FigS2h		Control	HFHS	FigS2i		Control	HFHS	FigS2j		Control	HFHS
	Body weight	28.3	45.9		Liver weight	1.357	1.725		Liver TG	0.021719	0.121282		Serum ALT	4.11714	82.0227		Serum AST	8.32356	26.6104		Steatosis score	0	3	Inflammation score	0	2	NAFLD activity score	0	5		Fasting blood glucose	4.3	8.4		Fasting insulin	20.052	93.5538		HOMA-IR	3.83	34.91
		31.2	48.2			0.973	2.303			0.045954	0.140369			2.89993	155.115			8.29644	48.6587			0	3		0	2		0	5			5.9	9			31.7111	122.434			8.31	48.95
		34.2	48.5			1.119	2.026			0.046303	0.108916			3.3369	98.3387			8.65242	29.5446			0	3		0	3		0	6			5.2	11.9			33.9401	240.6			7.84	127.2
		28.8	46.1			1.16	1.72			0.036588	0.106366			10.4887	115.978			17.2363	40.6462			0	2		0	2		0	4			5.4	8.5			12.1006	98.9441			2.9	37.36
		35.9	45.7			1.019	1.236			0.044588	0.06583			3.62807	26.735			14.9705	19.7644			0	2		0	3		0	5			7.1	7.3			56.1439	66.4849			17.71	21.56
		32.6	49.5			1.132	1.603			0.037964	0.10958			5.63725	43.7111			17.4765	24.1368			0	2		0	2		0	4			5.7	7.9			24.0276	124.416			6.08	43.67
		33.3	44.8			1.212	1.741			0.03779	0.146929			3.99376	70.5992			15.0444	28.5824			0	3		1	2		1	5			5.8	11.1			29.2357	166.938			7.53	82.32
		33.5	45.2			1.222	1.655			0.040456	0.180211			4.29469	42.9473			15.0444	24.8157			0	3		1	2		1	5			5.4	8			22.4845	111.878			5.39	39.76
		34.2				1.135				0.051579				3.69722				23.3268				0			0			0				4.9				42.4165				9.23
FigS2k	ipGTT	Control									HFHS									Control	HFHS
	0min	4.3	5.9	5.2	5.4	7.1	5.7	5.8	5.4	4.9	8.4	9	4.2	11.9	8.5	7.3	7.9	11.1	AUC of ipGTT	1134.75	1623.75
	15min	14.8	14.7	11.1	12.4	18.6	14.3	15.2	14.4	13.7	17.8	18.6	14.5	22.4	18.9	16.4	17.5	18.3		1216.5	1729.5
	30min	14.8	13.3	9.7	17.8	15.6	12.4	14	13.9	13.4	18.7	19.2	11	27.7	20.4	19.3	21.1	21.3		1092.75	2458.5
	60min	8.5	9.3	11.7	13.7	10.8	8.8	11	9.2	10.2	13.6	13	6.6	23.6	19	15.7	15.9	17.1		1482	2010.75
	90min	7.1	9.3	7.3	10.6	8.7	8	7.9	6.9	8.2	10.8	12.8	7.4	17	14.9	10.2	12	14.9		1377.75	1657.5
	120min	5.3	6.3	6.6	8.4	7.3	6.9	7	6.4	7.3	9.4	11.8	5.2	12.8	12.5	9.7	10.8	12		1143.75	1795.5
																				1258.5	1977
																				1148.25	1758
																				1205.25
	ipITT	Control									HFHS									Control	HFHS
	0min	4.9	7.2	6.7	6.6	7.7	7.6	6.8	6.5	6.5	8.7	10.5	9.8	9.1	8.9	9.3	11	10.6	AUC of ipITT	255	389.25
	15min	3.3	2.6	5.2	6.4	4.5	5.3	4.3	5.8	4.1	6.3	7.9	7.2	6	5.8	5.7	8.4	4.3		218.25	496.5
	30min	2.5	1.9	1.8	2.4	2.8	1.8	1.7	1.7	2.1	3.8	4.3	3.3	4.3	2.9	2.8	3.6	2.4		242.25	437.25
	60min	1.6	1	0.9	1.1	1.1	0.9	1	1.1	0.9	2.1	2.9	2.4	2.8	1.2	1.4	3.2	1		283.5	475.5
	90min	1.3	1.1	1	0.9	1.3	1.2	1.3	1.4	1.3	1.8	2.2	2.2	2.9	1.1	1.1	3.8	2.4		285.75	304.5
	120min	1.7	1.3	1.1	1.6	1.7	1.4	1.8	1.4	1.6	1.8	3.3	2.9	3.3	1.1	1.1	4.9	2.7		261	309.75
																				249.75	573
																				270	340.5
																				247.5

## Sheet: FigS3
FigS3a		Control	HFHS		Control	HFHS		Control	HFHS			Control									HFHS										Control									HFHS
	Conj/unconjugated BAs	5.41889	3.87391	primary/secondary BAs	0.466	2.554	12-OH/non-12-OH BAs	0.113124	0.461071	Non-12-OH BAs	TαMCA	10655.9	1073.07	1912.52	3979.32	769.04	9122.43	1938.4	2678.38	364.28	2635.82	2521.53	3869.6	2197.9	6549.73	3110.2	1992.44	2738.92	12-OH BAs	TCA	383.56	158.97	164.73	364.5	94.6	781.71	83.13	164.04	62.35	771.69	791.74	733.02	1057.69	2056.83	1252.42	715.21	352.78
		1.11829	3.66939		0.995	2.353		0.340706	0.476878		αMCA	176.95	88.01	11.49	9.08	40.89	99.55	11.28	16.47	17.03	41.66	41.5	26.5	26.46	91.22	14.39	39.44	4.59		GCA	1.89	2.31	1.29	1.26	0.95	8.13	1.06	2.11	0.83	0.95	0.86	0.25	1.79	5.25	0.27	0.7	0.19
		4.6787	7.80882		2.193	3.049		0.152541	0.195072		TβMCA	935.99	187.12	192.71	359.19	140.51	572.69	120.61	97.89	64.88	276.58	282.13	496.72	313.56	1142.61	721.92	266.96	548.59		CA	696.12	395.6	80.16	6.69	192.05	615.96	2.82	77.86	76.01	87.79	88.18	235.1	249.85	419.32	80.96	415.49	24.56
		17.651	3.51141		0.484	2.606		0.0878735	0.613695		βMCA	809.62	560.73	139.73	55.44	266.6	1434.57	113.76	230.12	157.89	178.66	199.88	167.6	161.66	197.97	48.05	212.01	28.05		TDCA	241.94	255.23	166.02	79.05	173.37	471.27	111.04	179.39	103.96	243.25	254.93	47.52	331.97	1404.04	198.26	234.5	28.44
		1.3222	9.08586		0.852	3.425		0.364172	0.458366		TCDCA	26.15	22.37	11.69	89.33	14	29.74	6.79	5.12	12.97	116.76	126.73	125.55	172.2	301.83	191.32	106.49	72.96		GDCA	1	0.84	0.35	0.56	1.11	1.34	0.78	1.18	0.14	0.43	0	0.44	0.34	1.19	0.46	0.32	0.82
		1.46278	14.545		1.232	2.784		0.455689	0.312016		CDCA	56.93	96.34	14.97	5.2	57.7	72.33	22.69	4.9	23.6	19.02	20.35	58.46	92.49	15.29	13.95	96.03	3.79		DCA	812.46	952.12	187.39	105.44	710.43	807.17	240.84	227.63	235.23	643.59	677.61	91.5	522.1	397.73	198.13	441.77	26.63
		4.72623	2.62351		0.541	2.311		0.108012	0.546186		TUDCA	41.35	19.31	14.31	28.72	13.21	43.81	6.52	10.26	10.68	30.73	32.03	57.24	48.16	128.84	46.26	32.83	34.26
		4.24944	35.457		1	4.972		0.142065	0.107688		GUDCA	0.05	0.03	0.02	0.01	0.18	0.19	0	0.03	0.03	0	0	0	0	0	0	0	0.07
		1.2615			0.68595			0.307584			UDCA	87.44	254.81	42.1	8.98	100.04	280.72	5.45	13.3	46.87	13.53	18.72	36.88	45.94	18.97	11.61	43.16	3.47
											TwMCA	9915.34	2767.6	1644.45	1643.94	1608.29	7673.99	1751.01	1630.78	659.16	511.25	583.95	1473.96	545.36	995.48	1375.46	672.28	653.46
											wMCA	776.21	1055.48	300.89	115.03	481.78	2107.8	361.87	425.38	358.22	91.74	92.51	92.13	67.84	74.44	51.58	91.38	18.82
											THDCA	271.48	251.78	161.05	213.95	127.83	361.34	128.26	70.32	49.06	22.71	20.7	28.06	31.85	125.13	80.98	43.24	21.9
											HDCA	111.34	245.83	34.18	37.99	125.44	175.91	40.26	31.23	44.67	11.65	15.83	10.68	19.54	15.91	8.15	21.62	1.92
											TLCA	3.91	3.71	1.69	1.79	2.7	1.95	1.37	0.87	1.53	1.25	2.1	1.02	3.14	6.63	2.33	2.06	0.97
											LCA	30.37	46.49	11.43	15.56	33.66	39.52	23.84	14.27	8.91	14.72	15.43	2.63	13.81	12.98	7.59	8.71	1.23
											THCA	18.37	3.18	1.59	0.87	2.13	8.6	0	0	0	4.09	0.8	2.64	0	1.24	3.76	0	0
											HCA	8.56	7.33	2.6	2.28	4.66	14.29	2.15	3.66	2.02	2.9	2.69	1.86	1.85	1.14	0.64	2.43	0.4
FigS3b		Control	HFHS		Control	HFHS		Control	HFHS			Control									HFHS										Control									HFHS
	Conj/unconjugated BAs	7.845	4.137	primary/secondary BAs	1.619	3.098	12-OH/non-12-OH BAs	0.1517	0.5989	Non-12-OH BAs	TαMCA	22.7608	331.753	28.2106	290.439	70.4509	225.525	210.368	11.1004	8.9122	10.4144	60.7884	19.6304	20.2839	41.1949	245.051	31.6537	30.0846	12-OH BAs	TCA	70.7955	294.149	158.961	334.035	262.656	226.432	178.494	77.6789	51.7624	73.7959	305.438	97.648	120.393	204.976	415.41	180.537	58.2941
		6.853	15.063		0.591	4.072		0.2147	0.3483		αMCA	12.0452	51.8213	34.9836	34.6754	43.0661	27.841	23.1438	10.1248	8.297	11.431	19.1153	13.8334	6.4512	27.6732	36.6722	9.682	13.8612		GCA	0.0888	0.4202	0.2123	0.2875	0.3004	0.5211	0.3111	0.0884	0.0539	0.046	0.3671	0.0611	0.0698	0.1361	0.245	0.0668	0.0166
		6.011	5.361		1.43	3.093		0.2005	0.2569		TβMCA	394.387	168.364	575.16	716.518	923.014	344.238	232.971	206.84	97.598	85.2045	632.415	251.02	163.902	434.238	294.44	296.747	237.447		CA	2.1679	8.8756	4.6619	3.8509	6.6241	5.492	2.7445	2.1582	1.2222	1.8441	4.9824	2.4016	2.0586	4.3543	10.6645	3.5738	0.8675
		19.077	10.178		0.471	3.756		0.0985	0.5697		βMCA	45.2712	77.6427	63.8676	67.7412	62.4121	62.319	61.4845	44.7992	21.0539	27.7646	39.0995	44.3569	17.2629	44.2093	45.0279	24.7835	28.7718		TDCA	26.0793	90.0023	32.4705	20.2405	63.7844	41.8549	29.7552	12.495	14.5979	30.5738	47.1772	4.1227	26.081	38.7765	46.5243	28.5206	2.2537
		9.617	7.471		1.363	4.553		0.1913	0.4005		TCDCA	9.114	67.522	17.0068	14.869	23.1896	13.4571	11.7837	5.4523	6.8782	19.1294	80.6646	0.2228	0.4292	0.2632	2.7555	0.4296	0.194		GDCA	0.0057	0.0472	0.0129	0.0014	0.0158	0.0187	0.0035	0.0033	0.0059	0.002	0.0078	0	0.0026	0.0062	0.0055	0.0011	0
		7.618	10.79		0.8	1.911		0.195	0.4379		GCDCA	0.0039	0.0331	0.013	0.0159	0.0223	0.0094	0.0053	0.0063	0.007	0.0089	0.028	0.0107	0.0093	0.011	0.0163	0.0122	0.0061		DCA	0.2548	0.6247	0.455	0.2074	0.5619	0.4911	0.3106	0.4401	0.3239	0.4323	0.333	0.0491	0.2758	0.5703	0.2476	0.1887	0.0199
		7.45	11.248		0.912	5.03		0.1985	0.502		CDCA	0.833	3.145	2.3974	3.4486	2.3846	2.3036	2.1654	1.1269	0.7625	1.8274	2.0338	1.7696	1.3171	1.8429	2.3049	1.3269	0.8499
		4.664	6.522		1.561	6.812		0.2419	0.1903		TUDCA	3.5119	20.9541	6.1151	16.3483	15.624	11.4646	7.1239	1.903	2.2514	1.741	9.3958	3.6873	3.5491	6.9836	14.0074	4.4511	2.7109
		4.995			1.317			0.2991			GUDCA	0.0005	0.0224	0.0096	0.0113	0.0169	0.0128	0.0002	0.0024	0.003	0.0024	0.0068	0.0041	0.0042	0.0008	0.0027	0.001	0.006
											UDCA	1.6333	11.5044	3.7599	6.3278	4.3314	4.4291	2.6924	0.8047	1.1866	1.5662	2.7046	2.0298	1.1537	2.8917	4.062	1.175	0.9335
											TwMCA	273.937	1406.26	472.588	2989.39	829.413	959.017	671.848	170.991	107.285	27.5379	207.492	107.841	50.8515	96.6585	463.165	64.3757	40.0488
											wMCA	11.9862	54.4082	30.8583	33.1904	29.6484	46.2325	30.3883	15.6519	8.0425	2.829	3.97	6.766	1.705	4.7475	9.1906	1.9575	1.9664
											THDCA	6.0457	51.8869	13.2109	33.4542	30.9904	14.4412	12.281	2.4189	3.502	1.1508	6.6049	2.5895	2.3229	3.2021	10.2833	3.2273	0.7206
											HDCA	3.4502	23.0414	9.303	14.2832	8.7695	9.7494	7.899	2.2071	2.0574	1.6726	1.5636	2.3683	1.0846	2.872	2.3266	1.3286	1.073
											TLCA	0.3915	1.3886	0.454	0.387	0.8454	0.3926	0.3266	0.1466	0.2322	0.4383	0.7354	0.1229	0.4409	0.3685	0.5544	0.3072	0.1282
											LCA	0.0612	0.1295	0.1106	0.0429	0.1338	0.0735	0.0721	0.0621	0.0595	0.037	0.0195	0.0104	0.0201	0.0294	0.0153	0.0094	0.0041
											GHCA	0.0839	0.4052	0.1903	0.2735	0.2933	0.4745	0.2989	0.0766	0.0484	0.0407	0.3575	0.0523	0.0625	0.1283	0.2296	0.0626	0.0124
											HCA	4.5327	24.6794	8.8398	9.1602	12.7162	17.3373	7.3179	4.4856	2.5135	1.3842	1.7969	3.3675	0.866	2.1032	4.1252	0.9388	1.5268
FigS3c		Control	HFHS		Control	HFHS		Control	HFHS			Control									HFHS										Control									HFHS
	Conj/unconjugated BAs	22.4855	30.4654	primary/secondary BAs	2.074	8.009	12-OH/non-12-OH BAs	0.1094	0.2706	Non-12-OH BAs	TαMCA	10976	6136.65	12996.9	19432.7	14341.4	2843.97	9156.5	2765.11	15356.9	27808.7	15329.8	17809.2	18421.1	16431.1	20492.4	7925.71	31749.3	12-OH BAs	TCA	17587	3336.7	32362.6	49789.8	17919.4	6549.51	45936.9	12810.4	24412.1	88669.6	24848.1	16196.9	32164	32491.5	51994.6	8058.07	44202.6
		5.59007	4.04502		0.929	5.817		0.1377	0.3679		αMCA	576.396	1245.63	358.891	26.7301	1282.29	307.248	18.9961	21.6503	560.599	224.486	1667.95	1243.46	1608.36	234.224	33.4868	860.271	36.423		GCA	22.141	7.4718	28.1155	27.2491	21.4903	14.4137	49.9016	20.9967	30.7018	27.7397	34.1625	14.8404	18.1006	13.7405	11.25	25.3876	11.2924
		32.3928	7.61783		2.151	4.559		0.0921	0.1694		TβMCA	168436	53159.2	342790	429978	142820	98723.8	369149	153995	170465	324073	116904	184281	115994	144201	123123	56789.2	268899		CA	5508.71	7628.71	7632.9	172.664	9566.41	4402.69	68.1102	416.83	6607.09	11891.1	30393.7	21625.4	34066.6	1801.72	405.724	17178	659.465
		2130.85	3.95116		2.1509	7.003		0.0757	0.4531		βMCA	1961.37	3941.78	2584.57	34.083	2859.66	2978.99	37.2047	247.712	2188.09	1308.56	6275	4536.12	5584.5	317.812	83.75	3418.28	184.204		TDCA	3429.79	732.096	4303.65	1761.07	3668.3	690.798	5868.21	1681.54	3701.17	8278.94	2799.83	620.106	4707.14	3725.45	2448.09	1988.5	1055.22
		13.8957	77.7046		1.338	6.634		0.1238	0.2011		TCDCA	835.306	300.141	2053.49	6455.8	1652.16	214.902	1727.85	256.046	1987.06	6759.07	2770.61	2094.1	3597.81	2660.75	4830.72	755.685	6643.28		GDCA	4.45479	0.798872	4.33131	1.6436	4.53564	3.01303	3.34646	2.61438	4.23977	2.56849	2.03151	0.638298	2.43506	2.98982	0.986842	2.00258	1.69713
		14.5219	396.916		1.305	4.0174		0.0806	0.2773		GCDCA	1.92819	0.328947	0	1.47059	5.34557	0	0.393701	0	2.04678	2.14041	2.23881	1.38298	0.081169	1.27226	1.57895	2.19638	1.43603		DCA	551.928	725.564	438.146	2.59516	783.099	388.274	3.14961	33.7418	400.512	209.846	650.166	141.649	831.818	38.9949	3.35526	658.592	3.98172
		2230.46	3.3436		2.1661	5.53		0.0906	0.3644		CDCA	170.279	429.37	293.313	12.0242	502.808	164.577	0.295276	7.43464	258.406	401.884	1608.95	1097.87	1572.32	47.5191	14.1447	763.76	45.953
		232.508	345.756		2.4779	10.2496		0.0672	0.133625		TUDCA	1211.7	252.867	1862.92	2822.92	1227.43	457.41	2074.11	620.915	1139.69	3494.86	1444.69	2183.99	1455.52	1400.19	1563.88	597.222	3591.84
		25.4673			1.346			0.1095			GUDCA	3.7234	1.17481	2.73556	2.07613	3.40173	2.28013	2.26378	1.63399	2.85088	2.22603	2.6534	2.34043	3.08442	2.4173	1.51316	1.93798	2.54569
											UDCA	189.428	439.192	254.331	0.432526	416.091	278.42	0	11.0294	225.292	81.0788	381.426	264.043	301.623	18.257	3.48684	197.933	12.5979
											TwMCA	89473.2	69605	170934	218508	127063	82681.2	186741	65953.1	152596	45469.3	24737.9	47023.7	18758.1	24961.8	46492.7	11135.7	32900.9
											wMCA	538.83	1771.81	605.927	18.2526	1165.39	951.384	74.0157	78.6765	779.532	83.1336	545.813	505.16	404.951	34.1603	15.8553	321.512	9.00783
											THDCA	2266.49	1770.63	5406.61	7176.56	5032.23	943.322	4680.31	1049.67	4389.18	1417.72	525.497	587.181	682.224	793.257	1282.96	474.031	452.676
											HDCA	108.311	518.938	127.584	1.12457	336.393	114.984	0	8.74183	130.775	14.6404	43.0763	44.0425	71.8344	4.19847	1.11842	69.8966	0
											TLCA	26.1303	14.6616	25.6839	10.2076	54.2657	0	22.8346	0	42.5439	42.0377	32.8358	5.21277	35.8766	26.145	14.2763	11.9509	13.6423
											LCA	2.65957	7.89474	2.5076	0.519031	10.9611	4.72313	1.5748	1.38889	3.21637	0.856164	3.89718	0.744681	4.13961	2.16285	1.51316	3.68217	0.456919
											THCA	131.05	102.726	223.328	302.855	217.279	108.795	217.618	68.9543	215.643	109.503	51.2438	97.8723	43.263	83.715	85.6579	16.4729	124.543
											HCA	3.78989	15.6955	1.97568	0	6.85745	4.96743	0	0	3.36257	0	4.27032	8.35106	3.81494	0	0	1.22739	0.652742
		Control	HFHS		Control	HFHS		Control	HFHS			Control									HFHS										Control									HFHS
FigS3d	Conj/unconjugated BAs	0.087763	0.007176	primary/secondary BAs	0.249874	0.572113	12-OH/non-12-OH BAs	0.563727	0.789812	Non-12-OH BAs	TαMCA	31.9	25	3.5	30.9	1353.3	5.4	94.8	3.8	3.6	2.1	10.4	1.3	3.1	2.6	99.2	4.6	0.5	12-OH BAs	TCA	6.1	7.7	1.9	13.2	273.9	7.5	14.3	8.5	3.4	1.9	8	0.6	3.3	2.4	79.5	3	0.2
		0.10793	0.011588		0.170773	0.731165		0.504563	0.734088		αMCA	2154.9	1702	776.8	1135.5	7197.6	529	1880	494.9	705.9	1638.3	3230	731.9	2464	979.2	4814.4	1290.7	349.5		CA	166	188.3	52.8	225.2	4716.8	89.9	103.9	59.8	64.4	103.5	1506.8	192.2	94	95.5	6464.5	245.3	68
		0.022161	0.010159		0.159169	0.536521		0.80738	0.654422		TβMCA	696	326.6	138.9	986.7	17532.1	306.3	1254.4	399.3	133.2	57.9	134.7	41.8	60.1	63.6	483.8	80.5	22.9		TDCA	27.5	13.1	6.7	20.6	398.7	8.9	28.8	6.9	12.2	4.5	16.5	0.8	9.2	2.7	68	13.4	0.7
		0.138698	0.007842		0.231793	0.564425		0.550322	0.668525		βMCA	2172.1	2028.7	1348.2	2201.8	3071.4	1194.9	2219.5	1501.1	703.9	2542	3036.3	1177.7	1933.2	1354.1	3361.6	1249	468.7		DCA	2544.3	2626	1879.4	1594.6	2445.4	2488.9	2269.3	1457.8	1841.6	3207.3	3347.5	1152.6	2953.5	1910.2	2771.6	1968.5	691.1
		1.11281	0.012782		0.478339	0.554952		0.237913	0.798806		TCDCA	1.4	1.6	1	2.4	18.1	1.4	0.9	0.9	1.1	1.1	2.8	0.7	1.2	1	8	1.4	0.7
		0.039312	0.035739		0.11448	1.16705		0.713915	0.922998		CDCA	48.8	54.8	9.9	54.7	563.5	14.7	19.4	12.2	15	23.6	236.9	38	39.6	24.5	701.4	48.9	12.1
		0.146711	0.016283		0.204056	0.559878		0.592958	0.888918		TUDCA	2.4	0.9	0	1.9	52.1	1	3.7	0.8	0.3	0	0.7	0.1	0.1	0.1	3.9	0.5	0
		0.053621	0.011037		0.227689	0.443316		0.75009	0.733998		UDCA	39.7	68.4	3.3	32.2	619.4	13.4	34	15.6	12.7	35.6	134.4	45.1	53	30	292.4	32.6	7
		0.030814			0.13143			0.709115			TwMCA	1341.6	2498.1	206.9	1911.8	36659.3	449.4	2796.9	253.9	255.6	10.2	36.3	14.2	14.6	11.4	262.1	18.9	2.8
											wMCA	5629.7	5840.8	4927.9	5909.4	7938.8	5786.3	8534.3	3588.5	3310.9	1160.2	1990.6	725.2	1223.5	560	2500	688.5	385.1
											THDCA	15.2	15.6	3.3	34.2	295.9	5.2	16.7	3.1	5.7	0	0.8	0	0.1	0.2	7.9	1.2	0
											HDCA	690.1	1026.8	452.7	834.8	1810.1	370.7	577.1	298.5	586.1	127.5	157.7	70.3	216.9	111.5	335.6	141	21.4
											TLCA	4.6	4.2	3.7	7.2	25.3	4.1	7.6	2.2	2.8	4	4.3	1.9	2.9	2.5	9.9	2.6	3.1
											LCA	448.1	276.8	297.3	411.2	380.8	254.4	315.9	182.9	316.5	282	434.4	69.7	590.8	249.3	339.3	296.3	115.1
											HCA	3509.7	5774.3	1168	2290.1	9036.5	3229.7	2884.6	845.6	2078.1	811.5	1689.2	850.4	1025.6	524.7	2181.5	427.8	339.2
		Control	HFHS		Control	HFHS		Control	HFHS			Control									HFHS										Control									HFHS
FigS3e	Conj/unconjugated BAs	0.081	0.008	primary/secondary BAs	0.339	0.926	12-OH/non-12-OH BAs	0.565618	0.801491	Non-12-OH BAs	TαMCA	19	17.6	4.2	6.3	24.3	8.7	11.9	3.3	1.7	3.5	2.9	1	8.1	2.3	1.7	4.1	8.3	12-OH BAs	TCA	9.7	6.2	3.2	9.7	15.8	18.8	17.3	9.9	2.5	2.2	1.1	0.7	5.8	2.3	3.8	2.6	6.5
		0.08	0.01		0.211	1.001		0.483195	0.645276		αMCA	963.1	1454	795.4	1379.2	1561.6	384.9	1097.4	497.6	624.5	1952.9	1135.5	683.4	3783.1	1563.6	289.3	1929.8	2605.4		CA	132.9	354.3	59	87.2	791.4	136.5	110.5	150.3	28.7	1233.8	632.7	257	1338.5	237.5	57.7	202.1	299.5
		0.032	0.007		0.187	0.602		0.685623	0.637916		TβMCA	527.2	255.9	270.5	337.3	491	725.1	653.9	477.2	148.7	58.9	52.5	30.3	106	57.9	45.9	73.7	154.5		TDCA	11.8	14.3	5	5.4	20.6	18	8.3	6.8	2.6	5.5	1	0.5	14.6	2.8	1.6	7.8	16.9
		0.032	0.01		0.191	0.835		0.638011	0.639192		βMCA	1484.6	1721.6	1417.2	1666.1	1425.4	1253.4	1860.6	2008.4	784.2	1949.3	1488.7	1156.7	2063.8	1303.8	314.3	1464.9	2218.6		DCA	1586.3	1950.2	1428.2	1501.6	1596.2	1517.2	1555.4	1530	1530	1997.6	1110.5	1040.8	2437.9	1840.8	1581	2371.3	3026.7
		0.08	0.01		0.304	0.64		0.587545	0.709636		TCDCA	2.1	1.7	0.9	3.1	2.9	2.5	2	0.9	1.1	0.9	1.2	0.5	1.8	1	0.9	1	2.2
		0.131	0.018		0.177	0.212		0.551436	1.15569		CDCA	66.3	72.8	9.6	50.1	64.4	22.7	16.6	37.7	13.1	103.6	85.9	39.9	182.2	50.2	12.1	42.7	97.7
		0.066	0.011		0.169	0.574		0.669657	0.793426		TUDCA	3.4	1.5	0.1	1.2	2.9	4.3	1.7	0.7	0.2	0.1	0.2	0	0.5	0.1	0.4	0.3	0.3
		0.066	0.016		0.303	0.56		0.623534	0.65819		UDCA	44.5	67.5	6.8	37.8	60.1	19.1	12.2	28.6	18.9	82.8	70.7	38.3	106.3	44.5	10.3	44	90.1
		0.018			0.152			0.679882			TwMCA	374	1359.6	211.5	321.2	824.7	1185.6	923	352.4	60.4	8.7	6.3	5.3	28.8	10.7	14.9	21.1	50.3
											wMCA	2403.8	4304.8	4394.3	5555.1	3861.1	4118.8	7466.8	3405.9	2871.8	867.4	478.8	675.8	1534.8	745	482.3	933.2	1726.6
											THDCA	11.3	16.8	3.9	9.3	20.8	18.5	6.5	3.7	1.9	0.1	0	0	0.6	0	0	0.2	0
											HDCA	415.5	808.8	437.8	819.4	864.1	268	458.7	272.4	518.4	118	62.5	59.4	183.5	112.6	109.9	162.6	162
											TLCA	3.5	3.9	2.9	2.9	4.4	4.1	6.8	3.4	2.2	2.6	3.4	2.2	2.9	2.2	2.4	2.5	4
											LCA	208.3	162.1	238.2	465.8	356.7	165.7	289.5	133.5	327.8	138.1	127.1	50.4	301.1	267.2	258.6	327.8	445.9
											HCA	1611.6	4961.5	1837.8	2840.7	2298.5	2840.6	2831.1	1260.6	1895.6	913	688.2	838.1	1820.7	711	394.3	717	1608.9

[truncated: 8 more sheets: FigS4, FigS5, FigS6, FigS7, FigS8, FigS11, FigS13, FigS14]
